# Supplementary material for: Selective inactivation of Gram-negative bacteria by carbon dots derived from natural biomass: Artemisia argyi leaves
Source: Royal Society of Chemistry journal article supplement (doi:10.1039/c9tb02735a), 2020-01-01
Supplement: c9tb02735a1.pdf [file c9tb02735a1.pdf]

**Selective inactivation of Gram-negative bacteria by carbon dots  
derived from natural biomass-*Artemisia argyi* leaves**

**Supporting Information**

Huibo Wang, Mengling Zhang, Yurong Ma, Bo Wang, Mingwang Shao, Hui Huang\*, Yang Liu\*,  
Zhenhui Kang\*

Institute of Functional Nano & Soft Materials (FUNSOM), Jiangsu Key Laboratory for Carbon-Based  
Functional Materials & Devices, Soochow University, 199 Ren'ai Road, Suzhou, 215123, China

E-mail: zhkang@suda.edu.cn; yangl@suda.edu.cn; hhuang0618@suda.edu.cn.

#### Determination of MIC and MBC for ACDs.

To obtain the MIC, in a 96-well, for each well 100  $\mu\text{L}$  of ACDs solution (PBS, between 0 and 200  $\mu\text{g mL}^{-1}$ ) was applied to 100  $\mu\text{L}$  of a *E. coli*, KRE *E. coli*, ARE *E. coli*, *P. aeruginosa*, *P. vulgaris*, *S. aureus* and *B. subtilis* suspension in PBS ( $10^5$  bacteria  $\text{mL}^{-1}$ ), respectively. After being incubated for 24 h at 37 °C, the MIC values were obtained since the lowest ACDs concentration at which bacterial growth was absent. For the MBC, aliquots of bacterial suspensions with different ACDs concentrations (between 0 and 200  $\mu\text{g mL}^{-1}$ ) were being incubated for 24 h at 37 °C. The MBC values were obtained by agar plating counting yielding no visible growth of bacteria on LB agar plates after being incubated for 24 h at 37 °C, and the lowest concentration at which no colony was found as the MBC values.

**Table S1.** Minimal Inhibitory Concentrations (MIC) and Minimal Bactericidal Concentrations (MBC) of *E. coli*, KRE *E. coli*, ARE *E. coli*, *P. aeruginosa*, *P. vulgaris*, *S. aureus* and *B. subtilis* against ACDs.

| ACDs                 | MIC ( $\mu\text{g/mL}$ ) | MBC ( $\mu\text{g/mL}$ ) |
|----------------------|--------------------------|--------------------------|
| <i>E. coli</i>       | 100                      | 150                      |
| KRE <i>E. coli</i>   | 100                      | 150                      |
| ARE <i>E. coli</i>   | 100                      | 150                      |
| <i>P. aeruginosa</i> | 150                      | 150                      |
| <i>P. vulgaris</i>   | 150                      | 150                      |
| <i>S. aureus</i>     | >200                     | >200                     |
| <i>B. subtilis</i>   | >200                     | >200                     |

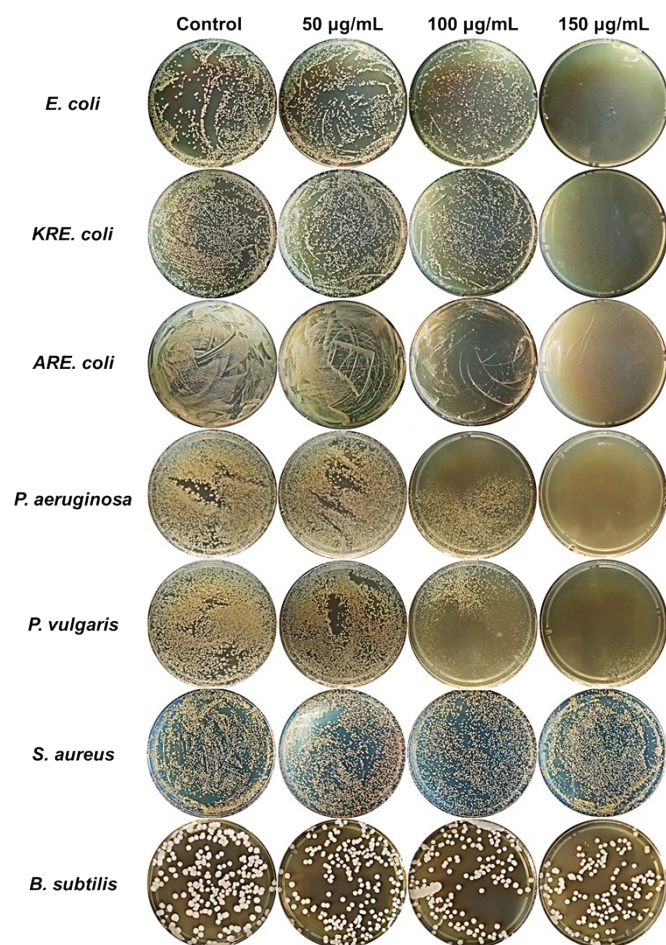

**Fig. S1** Photographs of LB agar plates of *E. coli*, KRE *E. coli*, ARE *E. coli*, *P. aeruginosa*, *P. vulgaris*, *S. aureus* and *B. subtilis* incubated with different concentrations of ACDs. before the notes and references.

---

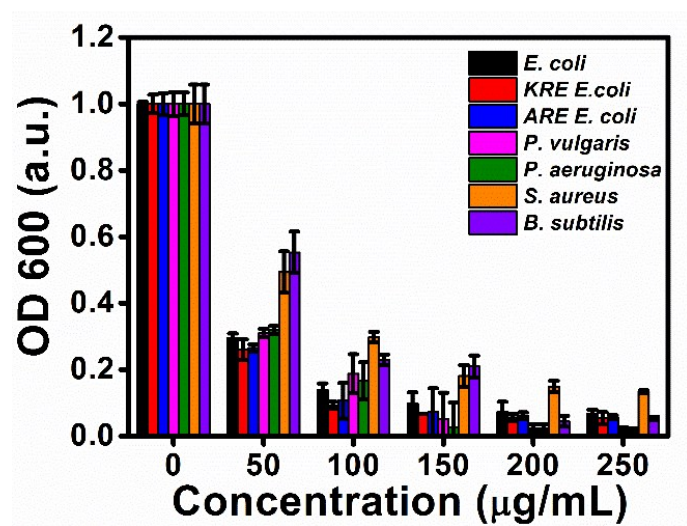

**Fig. S2** Bacteria growth of *E. coli*, *KRE E. coli*, *ARE E. coli*, *P. aeruginosa*, *P. vulgaris*, *S. aureus* and *B. subtilis* in liquid medium measured by OD600.
